# Supplementary material
Source: HighWire-hosted journal article supplement (http://ghspjournal.org/highwire/filestream/6558/field_highwire_adjunct_files/0/GHSP-D-21-00789-supplement.pdf)
Supplement: GHSP-D-21-00789-supplement.pdf [file GHSP-D-21-00789-supplement.pdf]

**Supplement to:** Rademacher KH, Sripipatana T, Danna K, et al. What have we learned? Implementation of a shared learning agenda and access strategy for the hormonal IUD. *Glob Health Sci Pract.* 2022;10(5):e2100789.  
<https://doi.org/10.9745/GHSP-D-21-00789>

**Supplement.** Revised Global Learning Agenda; Updated Through Consultation With Country-Level and Global Stakeholders in 2021

| Hormonal IUD Global Learning Agenda (2021 Version)                                                                                                                                                 | Current Status of Data From LMICs <sup>a</sup>             |
|----------------------------------------------------------------------------------------------------------------------------------------------------------------------------------------------------|------------------------------------------------------------|
| 1. Market potential                                                                                                                                                                                |                                                            |
| a. What are the profile(s) of clients who will potentially use this method?                                                                                                                        | Some data exist - quantity/quality limited or insufficient |
| b. Is there or would there be demand for this method among sub-populations with high unmet need for FP (e.g., women in lower wealth quintiles, postpartum women, adolescents, WLHIV, PAC clients)? | Some data exist - quantity/quality limited or insufficient |
| c. What will demand for and uptake of the method likely be among different market segments?                                                                                                        | Some data exist - quantity/quality limited or insufficient |
| d. What are reasons for demand/uptake among hormonal IUD users and how does this vary by different market segments?                                                                                | Some data exist - quantity/quality limited or insufficient |
| e. Will introduction of the hormonal IUD help reach new FP users (i.e., current non-users)?                                                                                                        | Some data exist - quantity/quality limited or insufficient |
| f. To what degree will introduction of the hormonal IUD result in “switching” and from what methods?                                                                                               | Some data exist - quantity/quality limited or insufficient |
| g. How does knowledge of non-contraceptive attributes of the hormonal IUD affect uptake? How does this vary by market segment?                                                                     | Some data exist - quantity/quality limited or insufficient |
| h. What are the service delivery channel(s) where different sub-populations are mostly likely to seek LARC provision including the hormonal IUD?                                                   | Some data exist - quantity/quality limited or insufficient |
| i. Will introduction of the hormonal IUD lead to overall increases in contraceptive prevalence?                                                                                                    | Data not currently available                               |
| 2. Users' experiences with the method                                                                                                                                                              |                                                            |
| a. How do continuation rates of the hormonal IUD compare to continuation rates of other FP methods including LARCs?                                                                                | Data exist                                                 |
| b. How do satisfaction rates with the hormonal IUD compare to continuation rates of other FP methods including LARCs?                                                                              | Data exist                                                 |
| c. What specific attributes of the hormonal IUD do users find acceptable/unacceptable?                                                                                                             | Some data exist - quantity/quality limited or insufficient |

**Supplement to:** Rademacher KH, Sripipatana T, Danna K, et al. What have we learned? Implementation of a shared learning agenda and access strategy for the hormonal IUD. *Glob Health Sci Pract.* 2022;10(5):e2100789.  
<https://doi.org/10.9745/GHSP-D-21-00789>

| <b>Hormonal IUD Global Learning Agenda (2021 Version)</b>                                                                                       | <b>Current Status of Data From LMICs<sup>a</sup></b>       |
|-------------------------------------------------------------------------------------------------------------------------------------------------|------------------------------------------------------------|
| d. What are users' perceptions of and experiences with menstrual changes associated with method use?                                            | Some data exist - quantity/quality limited or insufficient |
| e. What are users' perceptions of and experiences with non-contraceptive clinical uses of method (e.g. treatment for heavy menstrual bleeding)? | Some data exist - quantity/quality limited or insufficient |
| f. What are perceptions of the method among partners and other key influencers/decision-makers in FP users' lives?                              | Some data exist - quantity/quality limited or insufficient |
| g. What are rates of hormonal IUD use disclosure to partners and other key influencers vs. rates of discreet use?                               | Data not currently available                               |
| h. What are typical expulsion rates for the hormonal IUD in LMIC settings? How does this compare to the copper IUD?                             | Some data exist - quantity/quality limited or insufficient |
| i. What are expulsion rates among women in the immediate or extended postpartum period in LMIC settings? (Also, see section 6 below)            | Some data exist - quantity/quality limited or insufficient |
| 3. Providers' experiences with the method                                                                                                       |                                                            |
| a. What are health care providers' perceptions of and experiences with the hormonal IUD?                                                        | Data exist                                                 |
| b. What are health care providers' understanding of potential complications with the method and their ability to manage these?                  | Data not currently available                               |
| c. What provider-side barriers are there to method provision? How can these be effectively addressed?                                           | Some data exist - quantity/quality limited or insufficient |
| d. What are providers' perceptions of menstrual changes associated with method use and how do/will they counsel on these?                       | Some data exist - quantity/quality limited or insufficient |
| e. What are providers' perceptions of other side effects associated with method use and how do/will they counsel on these?                      | Some data exist - quantity/quality limited or insufficient |
| f. What are providers' perceptions of non-contraceptive clinical uses of the method (e.g., treatment for heavy menstrual bleeding)?             | Some data exist - quantity/quality limited or insufficient |
| g. How do providers' perceptions and experiences vary by level of pre-existing experience with other LARCs?                                     | Data not currently available                               |

**Supplement to:** Rademacher KH, Sripipatana T, Danna K, et al. What have we learned? Implementation of a shared learning agenda and access strategy for the hormonal IUD. *Glob Health Sci Pract.* 2022;10(5):e2100789. <https://doi.org/10.9745/GHSP-D-21-00789>

| <b>Hormonal IUD Global Learning Agenda (2021 Version)</b>                                                                                                                   | <b>Current Status of Data From LMICs<sup>a</sup></b>       |
|-----------------------------------------------------------------------------------------------------------------------------------------------------------------------------|------------------------------------------------------------|
| 4. Service delivery – training and method provision                                                                                                                         |                                                            |
| a. What are cost-effective approaches for training on the hormonal IUD for LARC-experienced providers?                                                                      | Some data exist - quantity/quality limited or insufficient |
| b. What are cost-effective approaches for training on the hormonal IUD for LARC-inexperienced providers?                                                                    | Some data exist - quantity/quality limited or insufficient |
| c. What level of post-training supervision is required? How does this differ among LARC-experienced vs. inexperienced providers?                                            | Data not currently available                               |
| d. What level of training/refresher training is required to transition to different inserter types for various hormonal IUD products?                                       | Data not currently available                               |
| e. What are effective service delivery models/channels for hormonal IUD provision? How does this differ by context?                                                         | Some data exist - quantity/quality limited or insufficient |
| f. To what extent is comprehensive counseling offered (including on side effects, menstrual changes, sexually transmitted infection prevention, options for removal, etc.)? | Some data exist - quantity/quality limited or insufficient |
| g. What are new or existing opportunities for task-sharing to support hormonal IUD service provision                                                                        | *Apply existing knowledge from provision of other LARCs    |
| h. What challenges, if any, do providers commonly experience when providing the hormonal IUD and how can these be overcome?                                                 | Data not currently available                               |
| 5. Service delivery – demand creation                                                                                                                                       |                                                            |
| a. What are effective demand creation strategies for the hormonal IUD to reach different market segments?                                                                   | Some data exist - quantity/quality limited or insufficient |
| b. How should messaging about the method’s attributes (contraceptive and noncontraceptive) be incorporated into demand creation strategies?                                 | Some data exist - quantity/quality limited or insufficient |
| c. How can messaging about the method be integrated into other health services? (Also, see Section 6 below)                                                                 | Data not currently available                               |
| d. How can messaging about the method be integrated into other sectors (e.g., via menstrual health platforms)?                                                              | Data not currently available                               |

**Supplement to:** Rademacher KH, Sripipatana T, Danna K, et al. What have we learned? Implementation of a shared learning agenda and access strategy for the hormonal IUD. *Glob Health Sci Pract.* 2022;10(5):e2100789. <https://doi.org/10.9745/GHSP-D-21-00789>

| <b>Hormonal IUD Global Learning Agenda (2021 Version)</b>                                                                        | <b>Current Status of Data From LMICs<sup>a</sup></b>       |
|----------------------------------------------------------------------------------------------------------------------------------|------------------------------------------------------------|
| 6. Service delivery – integrated approaches*                                                                                     |                                                            |
| a. How can we reach WLHIV with LARCs including hormonal IUD (e.g. through integrated FP-HIV service delivery models)?            | Some data exist - quantity/quality limited or insufficient |
| b. How can we reach women in the immediate and extended postpartum period with LARCs including hormonal IUD?                     | Some data exist - quantity/quality limited or insufficient |
| c. How can we integrate LARC services including hormonal IUD into youth-friendly FP programs?                                    | *Apply existing knowledge from provision of other LARCs    |
| d. How can we integrate LARC services including hormonal IUD provision into PAC services?                                        | *Apply existing knowledge from provision of other LARCs    |
| e. How can we integrate LARC services including hormonal IUD with cervical cancer screening?                                     | *Apply existing knowledge from provision of other LARCs    |
| f. How can we integrate LARC counseling/services including hormonal IUD with child immunization programs?                        | *Apply existing knowledge from provision of other LARCs    |
| g. How can we offer LARC services including hormonal IUD in humanitarian and refugee settings?                                   | *Apply existing knowledge from provision of other LARCs    |
| h. How can we reach women in the antenatal period with counseling/information on LARCs including hormonal IUD?                   | *Apply existing knowledge from provision of other LARCs    |
| 7. Service delivery – removal                                                                                                    |                                                            |
| a. How can countries ensure reliable access to affordable hormonal IUD removal services?                                         | Data not currently available                               |
| b. In addition to desire for pregnancy, what are reasons for seeking removal services?                                           | Some data exist - quantity/quality limited or insufficient |
| c. What is the prevalence of difficult removals and what are common challenges providers experience?                             | Data not currently available                               |
| d. Is self-removal an effective, safe, and acceptable option for women to try in LMIC settings? If yes, which group(s) of women? | Data not currently available                               |
| 8. Noncontraceptive attributes                                                                                                   |                                                            |
| a. Can use of the hormonal IUD help prevent or treat iron-deficiency anemia?                                                     | Some data exist - quantity/quality limited or insufficient |

**Supplement to:** Rademacher KH, Sripipatana T, Danna K, et al. What have we learned? Implementation of a shared learning agenda and access strategy for the hormonal IUD. *Glob Health Sci Pract.* 2022;10(5):e2100789. <https://doi.org/10.9745/GHSP-D-21-00789>

| <b>Hormonal IUD Global Learning Agenda (2021 Version)</b>                                                                                              | <b>Current Status of Data From LMICs<sup>a</sup></b>            |
|--------------------------------------------------------------------------------------------------------------------------------------------------------|-----------------------------------------------------------------|
| b. Does scale-up of the hormonal IUD help reduce rates of anemia?                                                                                      | Data not currently available                                    |
| c. Can scale-up of the hormonal IUD help promote women's health in other areas? [specify indicators]                                                   | Some data exist - quantity/quality limited or insufficient      |
| 9. Cost-effectiveness and pricing                                                                                                                      |                                                                 |
| a. To what extent is the hormonal IUD cost-effective for clients compared to other FP methods including other LARCs?                                   | Data exist                                                      |
| b. To what extent is the hormonal IUD cost-effective for donors/procurers compared to other FP methods including other LARCs?                          | Data exist                                                      |
| c. What is the willingness-to-pay for the hormonal IUD among different market segments and in different channels?                                      | Some data exist - quantity/quality limited or insufficient      |
| d. Does use of the hormonal IUD reduce financial or opportunity costs (e.g., through savings on menstrual hygiene supplies, days of school/work, etc.) | Some data exist - quantity/quality limited or insufficient      |
| e. What is willingness-to-stock/pay/procure among different purchasers and sectors (e.g., public vs. private)?                                         | Data not currently available                                    |
| f. What are the estimated costs / cost-savings for scaling-up the hormonal IUD as part of the national or sub-national contraceptive method mix?       | Some data exist - quantity/quality limited or insufficient      |
| 10. Equity                                                                                                                                             |                                                                 |
| a. What populations are being reached with initial/early roll-out of the hormonal IUD?                                                                 | Some data exist - quantity/quality limited or insufficient      |
| b. How can we ensure equitable access to LARC services across market segments for traditionally underserved populations?                               | *Apply existing knowledge from provision of other LARCs         |
| 11. Country dynamics for scale-up                                                                                                                      |                                                                 |
| a. To what extent is the Ministry of Health ready to scale the hormonal IUD in the public sector? What criteria impact decision-making?                | *Also refer to country-level monitoring indicators <sup>b</sup> |
| b. To what extent are private sector actors contributing to scaling the hormonal IUD? What factors encourage or discourage their participation?        | *Also refer to country-level monitoring indicators <sup>b</sup> |

**Supplement to:** Rademacher KH, Sripipatana T, Danna K, et al. What have we learned? Implementation of a shared learning agenda and access strategy for the hormonal IUD. *Glob Health Sci Pract.* 2022;10(5):e2100789. <https://doi.org/10.9745/GHSP-D-21-00789>

| Hormonal IUD Global Learning Agenda (2021 Version)                                                                              | Current Status of Data From LMICs <sup>a</sup>                  |
|---------------------------------------------------------------------------------------------------------------------------------|-----------------------------------------------------------------|
| c. What is the role of civil society in supporting and sustaining scale-up of the hormonal IUD as part of a broader method mix? | *Also refer to country-level monitoring indicators <sup>b</sup> |
| d. What are unique considerations / challenges for supply chain management for this method? How can these be addressed?         | *Also refer to country-level monitoring indicators <sup>b</sup> |

Abbreviations: FP, family planning; IUD, intrauterine device; LARC, long-acting reversible contraceptive; LMICs, low- and middle-income countries; PAC, postabortion care; WLHIV, women living with HIV.

<sup>a</sup> Assessment of the current status of evidence based on co-authors' review and assessment of existing data from across countries. See Table 3 for additional details.

<sup>b</sup> Country-level indicators monitored by members of the Hormonal IUD Access Group; for more information, email [info@hormonaliud.org](mailto:info@hormonaliud.org).
